# Supplementary material for: Root traits in Crambe abyssinica Hochst and Raphanus sativus L. plants are associated with differential tolerance to water deficit and post-stress recovery
Source: PeerJ journal article supplement (doi:10.7717/peerj.13595), 2022-06-14
Supplement: SM1._Morphophysiological_traits_of_Crambe_abyssinica.xlsx [file SM1._Morphophysiological_traits_of_Crambe_abyssinica.xlsx]

## Sheet: Crambe abyssinica
Supplementary material 1. Morphophysiological traits of Crambe abyssinica.
TREAT	DAYS	REP	WP	OPleaf	OProot	RWC	A	gs	E	CiCa	WUE	PH	SD	NN	LN	LA	LDM	StDM	SDM	RDM	TDM	RL	MRD	VFRL	FRL	LRL	TRL	VFRA	FRA	LRA	TRA	VFRV	FRV	LRV	TRV	SLA	LAR	RDMSDM	TRVSDM	SRL	RF	RTD	TRALA	SSA	RLD
WW	7	1	0.3	0.73	0.23	92.4	21.29	0.51	4.69	0.8	4.54	25.6	13.03	12	29	0.14	4.4	5.2	9.5	2.3	11.8	52.9	0.59	251.22	67.63	2.67	321.52	44.63	26.81	1.92	73.35	0.63	0.88	0.11	1.62	32.42	11.97	0.24	33.8	139.79	198.83	1.42	0.05	31.89	0.14
WW	7	2	0.32	0.8	0.34	94.6	24.21	0.71	6.3	0.83	3.84	26.9	12.23	13	30	0.14	4.7	4	8.7	2.1	10.8	52.8	0.59	285.8	64.26	2.7	352.76	50.9	25.34	1.91	78.16	0.72	0.82	0.11	1.65	30.77	13.45	0.24	40.78	167.98	213.52	1.27	0.05	37.22	0.16
WW	7	3	0.34	0.79	0.22	90.5	22.66	0.5	4.26	0.79	5.32	33.2	12.33	11	26	0.14	4.9	4.3	9.2	3.2	12.4	49.5	0.52	276.17	50.94	1.79	328.89	42.6	16.97	1.27	60.84	0.53	0.47	0.07	1.07	29.39	11.54	0.35	35.94	102.78	307.25	2.99	0.04	19.01	0.15
WW	7	4	0.29	0.73	0.14	96	22.33	0.56	5.57	0.81	4.01	24.7	12.33	13	31	0.15	4.8	4.5	9.2	2.2	11.4	52.8	0.58	262.73	48.13	1.78	312.64	45.68	16.41	1.25	63.34	0.63	0.5	0.07	1.2	31.96	13.32	0.24	33.98	142.11	260.1	1.83	0.04	28.79	0.14
WW	7	5	0.19	0.77	0.22	88.6	20.68	0.57	5.43	0.82	3.81	31	13.43	11	33	0.16	4.9	4.2	9.1	2.8	11.9	46	0.62	254.82	51.9	1.8	308.53	37.55	11.54	1.48	50.58	0.57	0.38	0.08	1.02	31.89	13.18	0.31	34.09	110.19	301.7	2.74	0.03	18.06	0.14
WD	7	1	0.61	1.13	0.23	90.4	20.8	0.46	3.96	0.79	5.25	21.5	12.12	10	15	0.1	3.9	3.4	7.3	1.8	9.1	57.5	0.56	400.42	71.82	3.67	475.91	68.92	27.81	2.59	99.32	0.94	0.88	0.09	1.92	24.38	10.45	0.25	65.19	264.39	247.88	0.94	0.1	55.18	0.21
WD	7	2	0.48	0.97	0.35	85.8	23.53	0.64	5.6	0.82	4.2	19	10.05	10	15	0.07	3	4.1	7.1	1.1	8.2	55	0.59	200.55	40.43	1.4	242.39	36	15.88	1.01	52.89	0.51	0.51	0.06	1.08	24.73	9.07	0.15	34.14	223.92	223.57	1	0.07	48.86	0.11
WD	7	3	0.41	0.81	0.2	89.5	19.5	0.39	3.49	0.77	5.58	11	12.83	11	28	0.14	4	3.1	7.1	1.1	8.2	54	0.59	371.21	95.75	3.18	470.14	67.6	25.18	2.45	95.24	0.98	0.81	0.09	1.88	36.19	17.74	0.15	66.22	443.53	249.94	0.56	0.07	89.85	0.21
WD	7	4	0.37	1.8	0.54	98.7	23.25	0.69	6.32	0.83	3.68	28	14.85	11	32	0.1	3.4	3.3	6.7	1	7.7	43.5	0.6	245.05	59.71	1.84	306.6	44.62	23.53	1.34	69.5	0.65	0.76	0.08	1.48	28.48	12.58	0.15	45.76	306.6	206.61	0.67	0.07	69.5	0.14
WD	7	5	0.55	0.9	0.48	82.9	22.27	0.59	5.38	0.82	4.14	23	12.12	11	35	0.13	3.7	2.8	6.5	1.2	7.7	41.5	0.59	285.91	54.13	2.12	342.17	52.07	20.68	1.55	74.31	0.75	0.64	0.09	1.49	35.28	17.04	0.18	52.64	294.97	230.11	0.78	0.06	64.06	0.15
RH	7	1	0.25	1.08	0.56	90.1	21.16	0.6	5.24	0.83	4.04	36	12.74	16	30	0.2	5.4	4.6	10	2.8	12.8	53	0.56	307	54.96	2.64	364.59	52.85	19.72	2.16	74.72	0.72	0.57	0.09	1.39	36.46	15.38	0.28	36.46	130.21	262.03	2.01	0.04	26.69	0.16
RH	7	2	0.3	0.75	0.6	86.3	19.35	0.56	4.3	0.84	4.5	36.1	12.37	15	29	0.18	5.5	3.6	9.1	2.1	11.2	51	0.58	314.76	65.9	2.26	382.93	55.69	25.42	1.65	82.75	0.78	0.8	0.1	1.68	33.28	16.35	0.23	42.08	182.35	227.32	1.25	0.05	39.41	0.17
RH	7	3	0.3	0.84	0.59	87.3	21.82	0.62	4.61	0.83	4.74	27.5	10.64	15	34	0.16	5	3.5	8.5	2.5	11	53	0.58	364.62	73.51	3.13	441.26	63.64	29.67	2.56	95.87	0.88	0.57	0.09	1.55	32	14.55	0.29	51.91	176.5	285.17	1.62	0.06	38.35	0.2
RH	7	4	0.35	0.78	0.47	89.1	19.25	0.37	3.41	0.76	5.64	29	11.33	12	26	0.15	4.6	3.4	8	2.1	10.1	49	0.57	237.05	39.37	2.11	278.54	41.37	14.6	1.5	57.47	0.57	0.44	0.08	1.1	32.9	14.98	0.26	34.82	132.64	253.11	1.91	0.04	27.37	0.12
RH	7	5	0.25	0.73	0.47	88.1	21.72	0.67	5.76	0.84	3.77	31.7	12.73	13	26	0.16	4.6	4.2	8.8	2.3	11.1	50	0.56	263.66	39.62	1.41	304.69	45.39	14.86	0.98	61.23	0.62	0.46	0.05	1.13	35.04	14.52	0.26	34.62	132.47	268.82	2.03	0.04	26.62	0.14
WW	14	1	0.4	0.71	0.21	95.2	27.9	0.76	7.71	0.82	3.62	72.5	14	17	44	0.21	7.9	9.8	17.7	4.2	21.9	48.3	0.89	0	503.95	7.23	511.19	0	136.26	4.93	141.19	0	3.07	0.27	3.35	27.07	9.72	0.24	28.96	121.71	152.81	1.26	0.07	33.62	0.23
WW	14	2	0.33	0.69	0.35	86.2	26.25	0.45	5.34	0.73	4.92	72	13.78	16	50	0.29	8.9	11.8	20.7	4.5	25.1	54	0.88	0	465.8	8.05	473.85	0	127.38	5.32	132.7	0	2.93	0.28	3.21	32.57	11.48	0.22	22.95	106.48	147.55	1.39	0.05	29.82	0.21
WW	14	3	0.33	0.71	0.25	91.3	22.36	0.42	4.99	0.75	4.48	70.5	12.98	16	50	0.25	7.7	9.1	16.8	4	20.7	55.3	0.79	0	394.39	4.52	398.91	0	100.06	2.73	102.78	0	2.05	0.13	2.18	32.96	12.18	0.24	23.82	100.99	182.78	1.81	0.04	26.02	0.18
WW	14	4	0.3	0.73	0.44	98	21.3	0.54	5.75	0.81	3.71	80.5	13.74	18	53	0.27	8.6	10.3	18.9	4.3	23.1	57.8	0.82	0	581.19	5.46	586.66	0	151.97	3.37	155.34	0	3.22	0.17	3.39	31.91	11.81	0.23	31.12	138.04	173.01	1.25	0.06	36.55	0.26
WW	14	5	0.35	0.75	0.41	86	27.71	0.6	6.04	0.78	4.59	85.5	14.6	19	44	0.24	8.6	12.5	21	4.3	25.3	55.3	0.78	0	608.82	4.32	613.14	0	158.64	3.27	161.91	0	3.49	0.12	3.61	28.29	9.56	0.2	29.2	142.59	169.63	1.19	0.07	37.65	0.27
WD	14	1	0.6	0.85	0.43	82.8	23.15	0.41	5.15	0.74	4.5	69	10.85	17	41	0.17	6	7.9	13.9	3.7	17.6	43	0.77	0	746.07	0.94	747.01	0	188.43	0.68	189.11	0	3.94	0.04	3.98	28.75	9.8	0.27	53.74	201.89	187.89	0.93	0.11	51.11	0.33
WD	14	2	0.65	0.84	0.29	80	24.4	0.48	5.48	0.76	4.45	65	11.86	16	36	0.19	6.6	7.2	13.8	3.3	17.1	50	0.7	0	639.8	1.16	640.96	0	151.83	0.78	152.61	0	3.04	0.04	3.08	29.5	11.39	0.24	46.45	194.23	207.83	1.07	0.08	46.25	0.28
WD	14	3	0.55	0.82	0.27	89.8	19.76	0.51	5.68	0.81	3.48	67	13.52	17	45	0.27	7.6	6.9	14.5	3.3	17.8	42.7	0.76	0	618.16	0.95	619.11	0	146.34	0.65	147	0	2.87	0.04	2.91	35	14.94	0.23	42.7	187.61	212.43	1.13	0.06	44.54	0.28
WD	14	4	0.6	0.77	0.52	69	21.76	0.43	5.08	0.76	4.29	69	12.93	17	46	0.23	7.2	6.3	13.5	3.5	17	48	0.71	0	510.27	0.81	511.08	0	118.48	0.54	119.03	0	2.26	0.03	2.29	32.6	13.81	0.26	37.86	146.02	223.44	1.53	0.05	34.01	0.23
WD	14	5	0.55	0.78	0.47	78.2	19.73	0.32	3.99	0.72	4.95	56	12.69	14	25	0.16	5.5	5.3	10.8	3.3	14.1	61.5	0.68	0	827.37	0.94	828.31	0	183.75	0.6	184.35	0	3.37	0.03	3.4	29.19	11.39	0.31	76.7	251	243.62	0.97	0.11	55.86	0.37
RH	14	1	0.25	0.72	0.3	96.9	22.12	0.41	5.82	0.75	3.8	97	12.76	19	44	0.21	6.8	12.6	19.4	5.2	24.6	50	0.86	0	595.49	3.8	599.28	0	168.74	3.35	172.09	0	4	0.17	4.16	31.22	8.63	0.27	30.89	115.25	144	1.25	0.08	33.09	0.27
RH	14	2	0.28	0.67	0.29	81.2	22.69	0.37	5.23	0.71	4.34	82	12.74	17	47	0.24	7.7	8.8	16.5	4.5	21	53	0.85	0	503.24	3.58	506.82	0	149.5	2.92	152.41	0	3.61	0.19	3.8	31.63	11.6	0.27	30.72	112.63	133.39	1.18	0.06	33.87	0.23
RH	14	3	0.3	0.75	0.26	78.1	25.29	0.64	7.3	0.81	3.47	99	13.14	20	53	0.21	7.9	12.8	20.7	4.3	25	54.5	1	0	503.96	4.82	508.79	0	158.32	3.03	161.36	0	3.96	0.15	4.11	26.69	8.43	0.21	24.58	118.32	123.8	1.05	0.08	37.52	0.23
RH	14	4	0.4	0.65	0.24	90.5	15.79	0.35	5.01	0.79	3.15	92	11.98	18	45	0.17	5.8	8.3	14.1	3.9	18	48.5	0.93	0	467.98	3.09	471.07	0	138.75	2.37	141.12	0	3.32	0.15	3.47	29.09	9.37	0.28	33.41	120.79	135.86	1.12	0.08	36.19	0.21
RH	14	5	0.3	0.72	0.21	86.7	21.47	0.44	5.84	0.76	3.68	92.5	12.66	19	47	0.21	7.1	10.6	17.7	4	21.7	51.5	0.93	0	445.54	3.68	449.22	0	132.17	2.82	134.99	0	3.17	0.18	3.34	29.63	9.63	0.23	25.42	111.61	134.42	1.2	0.06	33.54	0.2
WW	21	1	0.4	0.71	0.26	83.5	20.53	0.42	4.79	0.77	4.28	133.5	14.93	26	51	0.26	8.1	23.1	31.1	6	37.1	52	0.73	0	481.19	0.61	481.8	0	113.35	0.4	113.76	0	2.2	0.02	2.22	31.71	6.88	0.19	15.49	80.3	216.65	2.7	0.04	18.96	0.21
WW	21	2	0.4	0.75	0.21	82.3	22.26	0.3	3.46	0.67	6.43	133	14.22	24	50	0.25	7.3	23.6	30.9	5.4	36.3	48	0.75	0	556.81	0.36	557.17	0	124.95	0.24	125.2	0	1.7	0.02	1.71	35.03	7.01	0.18	18.06	103.18	324.96	3.15	0.05	23.18	0.25
WW	21	3	0.4	0.79	0.19	87.6	22.26	0.26	2.82	0.62	7.89	127.5	13.74	25	44	0.25	5.5	20.2	25.7	5	30.7	49.3	0.66	0	604.02	0.48	604.51	0	128.73	0.32	129.05	0	2.28	0.01	2.29	45.45	8.16	0.19	23.57	120.9	264.19	2.19	0.05	25.81	0.27
WW	21	4	0.4	0.69	0.25	93.1	20.97	0.39	3.62	0.75	5.79	123.5	14.38	25	39	0.22	6.8	22.1	28.8	5.4	34.2	46.5	0.64	0	742.38	0.52	742.9	0	158.5	0.35	158.84	0	2.91	0.02	2.93	32.38	6.39	0.19	25.8	137.57	253.67	1.84	0.07	29.42	0.33
WW	21	5	0.42	0.86	0.24	82.4	21.67	0.3	2.94	0.68	7.36	134.1	14.13	25	51	0.24	7.8	25.3	33.1	6	39.1	58.6	0.72	0	597.43	0.65	598.09	0	138.08	0.42	138.5	0	2.67	0.02	2.69	31	6.19	0.18	18.06	99.68	222.57	2.23	0.06	23.08	0.27
WD	21	1	1	0.86	0.28	82.2	17.25	0.24	3.02	0.68	5.71	113	13.8	27	56	0.26	7.9	18	25.9	4.9	30.8	47	0.77	0	483.78	0.22	484	0	119.09	0.16	119.25	0	2.37	0.02	2.39	32.63	8.37	0.19	18.69	98.78	202.43	2.05	0.05	24.34	0.22
WD	21	2	0.85	1.01	0.31	86.7	17.12	0.25	2.97	0.7	5.76	122	13.76	26	38	0.24	7.2	16.5	23.7	5.7	29.4	47.5	0.68	0	485.87	0.68	486.55	0	106.94	0.43	107.37	0	1.93	0.02	1.95	33.29	8.15	0.24	20.53	85.36	249.31	2.92	0.04	18.84	0.22
WD	21	3	0.9	0.81	0.26	82.7	18.11	0.22	2.39	0.64	7.56	102	12.68	23	54	0.27	9.3	16.3	25.6	5.2	30.8	35.5	0.72	0	686.35	0.65	687	0	164.1	0.4	164.5	0	3.29	0.02	3.31	29.34	8.86	0.2	26.84	132.12	207.52	1.57	0.06	31.63	0.31
WD	21	4	0.85	0.95	0.29	79.6	18.83	0.23	2.44	0.64	7.71	75	12.24	14	46	0.23	7.2	16.8	24	4.2	28.2	38.5	0.65	0	627.49	0.5	627.98	0	136.4	0.33	136.74	0	2.51	0.02	2.53	32.07	8.19	0.18	26.17	149.52	248.56	1.66	0.06	32.56	0.28
WD	21	5	0.95	0.91	0.3	74.1	17.83	0.26	2.55	0.59	6.98	69	12.3	16	44	0.21	7.2	16.2	23.4	6.2	29.6	50	0.62	0	649.58	0.43	650.01	0	194.32	0.28	194.6	0	3.23	0.01	3.25	29.06	7.07	0.26	27.78	104.84	200.2	1.91	0.09	31.39	0.29
RH	21	1	0.35	0.68	0.25	83.1	17.01	0.28	4.18	0.72	4.07	118	13.14	22	36	0.21	5.8	20.3	26.1	3.1	29.2	48	0.67	0	663.79	1.36	665.14	0	149.78	0.94	150.72	0	2.88	0.05	2.93	35.53	7.06	0.12	25.48	214.56	226.82	1.06	0.07	48.62	0.3
RH	21	2	0.25	1.03	0.25	79.2	21.07	0.33	4.39	0.71	4.8	74	11.36	15	40	0.2	6.1	17.9	24	3	27	36	0.72	0	681.01	2.09	683.1	0	161.03	1.43	162.46	0	3.17	0.08	3.25	32.39	7.32	0.13	28.46	227.7	210.36	0.92	0.08	54.15	0.3
RH	21	3	0.27	0.82	0.28	87.9	17.59	0.29	3.89	0.72	4.52	93	13.15	21	41	0.25	7.6	15.2	22.8	3.3	26.1	42	0.7	0	581.5	1.33	582.83	0	136.21	0.88	137.09	0	2.68	0.05	2.72	32.93	9.59	0.14	25.56	176.61	214.04	1.21	0.05	41.54	0.26
RH	21	4	0.4	0.69	0.26	90.3	10.47	0.13	2.04	0.71	5.14	92	12.01	22	32	0.21	4.8	15.8	20.6	3.8	24.4	46	0.72	0	636.42	1.67	638.1	0	150.17	1.16	151.33	0	2.94	0.07	3.01	43.69	8.59	0.18	30.98	167.92	212.03	1.26	0.07	39.82	0.28
RH	21	5	0.4	0.76	0.25	88	16.25	0.26	3.59	0.71	4.52	103	11.9	23	35	0.14	4.5	15.8	20.3	3.3	23.6	44	0.72	0	510.82	2.44	513.26	0	121.16	1.73	122.89	0	2.4	0.1	2.5	31.27	0.006	0.16	25.28	155.53	205.63	1.32	0.09	37.24	0.23
