# Supplementary material for: Root traits in Crambe abyssinica Hochst and Raphanus sativus L. plants are associated with differential tolerance to water deficit and post-stress recovery
Source: PeerJ journal article supplement (doi:10.7717/peerj.13595), 2022-06-14
Supplement: SM2._Morphophysiological_traits_of_Raphanus_sativus.xlsx [file SM2._Morphophysiological_traits_of_Raphanus_sativus.xlsx]

## Sheet: Raphanus sativus
Supplementary material 2. Morphophysiological traits of Raphanus sativus.
TREAT	DAYS	REP	OPleaf	OProot	RWC	A	gs	E	CiCa	WUE	PH	SD	NN	LN	LA	LDM	StDM	SDM	RDM	TDM	RL	MRD	VFRL	FRL	LRL	TRL	VFRA	FRA	LRA	TRA	VFRV	FRV	LRV	TRV	SLA	LAR	RDMSDM	TRVSDM	SRL	RF	RTD	TRALA	SSA	RLD
WW	7	1	0.87	0.14	91.3	25.71	0.67	5.77	0.82	4.45	31.8	15.89	6	12	0.12	2.6	3.7	6.3	1.7	8	31.5	0.72	505.14	64.27	2.08	571.48	78.16	25.44	1.46	105.07	2.04	0.83	0.15	3.02	45.09	14.67	0.28	91.44	328.44	189.3	0.58	0.09	60.38	0.25
WW	7	2	0.83	0.2	95.4	24.32	0.61	5.55	0.81	4.39	18	16.22	9	10	0.12	4.6	1.9	6.5	1.8	8.3	46.8	0.6	459.1	77.29	4.42	540.81	83.09	30.23	3.2	116.52	1.2	0.98	0.19	2.36	27.17	14.97	0.28	83.85	298.79	229.08	0.77	0.09	64.38	0.24
WW	7	3	0.65	0.18	85.4	25.19	0.73	7.11	0.83	3.55	20.4	13.52	8	8	0.05	1.3	2.3	3.6	1.3	4.9	27.8	0.6	362.78	73.17	2.96	438.9	68.2	29.05	1.19	98.45	1.03	0.95	0.14	2.11	42.27	11.01	0.35	122.05	348.34	207.57	0.6	0.18	78.13	0.2
WW	7	4	0.91	0.31	94.6	20.63	0.57	5.43	0.82	3.8	19.4	14.22	9	11	0.12	3.5	2.9	6.4	1.7	8.1	46	0.58	313.55	76.6	3.62	393.77	54.53	29.09	4.87	88.5	1.23	0.92	0.15	2.3	35.03	15.17	0.26	61.53	234.39	171.54	0.73	0.07	52.68	0.18
WW	7	5	0.72	0.25	91.3	23.28	0.76	6.47	0.85	3.6	25.2	14.04	9	10	0.12	3.2	3	6.1	1.7	7.8	43.3	0.58	369.2	61.09	3.05	433.34	71.33	23.55	2.24	97.11	1.11	0.75	0.13	1.99	37.95	15.29	0.28	71.04	251.94	217.82	0.86	0.08	56.46	0.19
WD	7	1	0.74	0.2	78.5	25.91	0.63	5.55	0.8	4.67	22	8.48	9	12	0.07	1.7	3.6	5.3	1.3	6.6	36	0.93	322.73	66.43	2.31	391.47	65.99	27.16	1.75	94.91	0.95	0.91	0.11	1.97	42.82	11.1	0.24	73.86	310.69	198.62	0.64	0.13	75.32	0.17
WD	7	2	0.86	0.32	92.2	26.05	0.6	5.57	0.79	4.67	7	13.59	6	8	0.14	4.2	2.6	6.8	1.7	8.5	29.3	0.6	274.38	66.15	2.21	342.74	50.71	26.77	1.63	79.1	0.75	0.89	0.14	1.78	32.87	16.22	0.25	50.4	200.43	192.59	0.96	0.06	46.26	0.15
WD	7	3	0.88	0.31	84.2	19.38	0.57	5.46	0.84	3.55	3.5	8.41	4	7	0.09	2.8	1.1	3.9	1.5	5.4	33	0.6	362.32	97.43	4.2	463.95	66.96	39.04	3.29	109.28	0.98	1.28	0.21	2.47	31.34	16.28	0.38	118.96	311.38	187.62	0.6	0.12	73.34	0.21
WD	7	4	1	0.32	87.6	26.19	0.64	5.86	0.8	4.47	22	13.14	11	13	0.12	3.1	2.5	5.6	1.4	7	29.2	0.62	345.87	76.87	4.29	427.04	63.92	31.32	3.18	98.42	0.94	1.05	0.19	2.18	37.7	16.67	0.25	76.26	302.86	196.04	0.65	0.08	69.8	0.19
WD	7	5	1.14	0.39	75.6	19.68	0.55	5.34	0.83	3.68	10	8.49	6	6	0.05	1.5	2	3.5	1.3	4.8	16.5	0.61	344.14	79.82	2.73	426.68	64.52	31.75	2.06	98.33	0.96	1.03	0.13	2.12	30.5	9.51	0.37	121.91	325.71	201.63	0.62	0.21	75.06	0.19
RH	7	1	0.64	0.44	91	25.28	0.55	5.42	0.78	4.66	47.4	15.08	12	12	0.14	3	3	6	1.3	7.3	44	0.56	354	139.33	11.45	504.78	60.94	54.99	11.88	127.8	0.83	1.79	0.55	3.17	46.18	18.99	0.22	84.13	389.49	159.09	0.41	0.09	98.61	0.22
RH	7	2	0.68	0.24	93.3	21.55	0.59	5.62	0.82	3.84	7.8	6.9	9	9	0.08	2.3	1.1	3.4	1.8	5.3	48	0.6	456.7	215.29	14.23	686.22	81.29	86.52	10.61	178.41	1.15	2.86	0.63	4.64	36.31	15.8	0.54	199.37	372.14	147.74	0.4	0.21	96.75	0.3
RH	7	3	0.77	0.24	84.4	26.93	0.7	6.41	0.81	4.2	46	11.05	10	13	0.11	2.2	2.2	4.4	1.5	5.9	52	0.58	372.56	145.55	15.37	533.48	65.93	58.32	19.21	143.47	0.93	1.93	0.75	3.61	49.87	18.64	0.34	121.25	359.49	147.84	0.41	0.13	96.68	0.24
RH	7	4	0.69	0.39	92.6	25.45	0.65	6.43	0.81	3.96	6.5	16.41	10	10	0.14	3.8	1.2	5	1.4	6.4	40.5	0.56	397.56	152.65	13.6	563.82	68.43	60.75	10.45	139.63	0.94	1.99	0.66	3.59	37.78	22.57	0.27	112.76	413.96	157.27	0.38	0.1	102.52	0.25
RH	7	5	0.81	0.59	87.5	24.11	0.65	6.68	0.82	3.61	4.5	12.6	9	9	0.12	3.8	1	4.8	1.3	6.1	40.5	0.6	429.9	172.49	13.57	615.96	76.03	69.93	10.32	156.29	1.07	2.34	0.63	4.04	31.17	19.46	0.28	129.13	467.35	152.53	0.33	0.13	118.58	0.27
WW	14	1	0.65	0.25	90	26.18	0.78	7.94	0.86	3.3	15.3	17.57	10	10	0.19	7.5	3.7	11.2	5.1	16.3	47	0.76	1275.55	138.09	26.44	1440.08	313.16	67.38	25.07	405.6	6.24	2.66	2.07	10.97	24.88	11.45	0.46	128.58	282.37	131.28	0.46	0.22	79.53	0.64
WW	14	2	0.75	0.22	98.2	26.59	0.76	7.84	0.83	3.39	19.3	17.89	13	13	0.2	9	4.9	13.9	3.9	17.8	49.5	0.82	1352.1	153.21	29.95	1535.26	332.72	74.36	24.42	431.5	6.61	2.94	1.68	11.23	22.2	11.2	0.28	110.85	393.66	136.71	0.35	0.22	110.64	0.68
WW	14	3	0.79	0.16	86.2	31.37	0.81	8.09	0.81	3.88	33.5	16.81	15	15	0.24	9.9	6.3	16.2	5.1	21.3	71	0.81	1183.35	179.73	22.32	1385.4	297.45	81.26	20.09	398.8	6.05	4.71	1.54	12.3	24.37	11.3	0.32	85.78	271.65	112.64	0.41	0.17	78.2	0.62
WW	14	4	0.64	0.41	84.8	24.03	0.79	7.98	0.85	3.01	28.8	19.05	15	15	0.23	9.6	6.7	16.3	6	22.3	42	0.78	1355.27	160.77	21.15	1537.18	334.38	86.94	17.19	438.51	6.66	3.96	1.2	11.83	24.24	10.41	0.37	94.6	256.2	129.98	0.51	0.19	73.08	0.68
WW	14	5	0.54	0.2	93.2	22.73	0.75	7.86	0.85	2.89	45.8	19.3	16	16	0.23	9.5	7.4	16.8	4.3	21.1	48.8	0.79	1270.39	151.12	20.3	1441.81	311.42	76.65	16.61	404.69	6.15	3.2	1.14	10.49	24.47	10.96	0.26	85.82	335.3	137.44	0.41	0.18	94.11	0.64
WD	14	1	0.81	0.77	60.6	28.32	0.74	6.84	0.81	4.14	6	23.7	12	12	0.18	7.4	3	10.4	6.1	16.5	53.5	0.73	927.22	64.72	7.64	999.57	192.85	28.06	5.25	226.15	3.2	0.97	0.29	4.47	24.17	10.84	0.59	96.11	163.86	223.69	1.37	0.13	37.07	0.44
WD	14	2	0.88	0.48	57.1	26.72	0.72	6.76	0.82	3.95	12.5	15	11	11	0.17	7.4	3.6	11	5.1	16.1	43.5	0.69	1057.73	75.36	7.63	1140.72	218.87	11.61	5.43	235.92	3.62	1.13	0.31	5.06	23.34	10.73	0.46	103.7	223.67	225.41	1.01	0.14	46.26	0.51
WD	14	3	0.79	0.48	47.6	30.64	0.74	6.93	0.8	4.42	16	14.97	11	11	0.2	7.7	3.3	11	9.6	20.6	57	0.69	1191.32	76.71	7.99	1276.02	258.11	33.24	5.39	296.74	4.45	1.15	0.29	5.89	26.01	9.72	0.87	116	132.92	216.68	1.63	0.15	30.91	0.57
WD	14	4	0.84	0.68	67.2	30.88	0.73	7.04	0.79	4.38	8.5	13.51	9	9	0.15	5.9	2.8	8.7	4.5	13.2	46	0.62	1860.94	107.88	9.32	1978.14	359.73	46.55	6.39	412.66	5.53	1.63	0.35	7.52	24.93	11.14	0.52	227.37	439.59	263.11	0.6	0.28	91.7	0.88
WD	14	5	0.74	0.73	53.1	18.07	0.73	6.89	0.78	2.62	23	12.6	12	12	0.18	5.9	3.9	9.8	4.1	13.9	41	0.69	1176.51	100.69	8.14	1285.34	183.15	43.63	9.48	236.26	3.16	1.5	0.52	5.18	30.96	13.14	0.42	131.16	313.5	248.21	0.79	0.13	57.62	0.57
RH	14	1	0.69	0.24	86.9	31.4	0.73	7.81	0.79	4.02	42	17.76	15	15	0.18	7.6	6.2	13.8	4.6	18.4	52.5	0.91	1505.54	203.29	6.32	1715.15	429.98	123.52	7.36	560.86	9.77	6.12	0.68	16.58	23.63	9.76	0.33	124.29	372.86	103.47	0.28	0.31	121.93	0.76
RH	14	2	0.74	0.26	86.5	30.64	0.69	7.36	0.78	4.16	25	13.9	15	15	0.27	8.9	5.3	14.2	4.2	18.4	34.5	0.89	1138.87	102.13	4.8	1245.79	318.03	58.78	1.33	378.14	7.07	2.73	0.7	10.49	29.85	14.44	0.3	87.73	296.62	118.72	0.4	0.14	90.03	0.55
RH	14	3	0.69	0.27	85.7	30.33	0.68	7.37	0.78	4.12	40	22.01	14	14	0.26	9.8	6.3	16.1	4	20.1	54	0.91	1057.95	138.95	3.49	1200.39	299.9	86.66	4.64	391.2	6.77	4.5	0.5	11.77	26.32	12.83	0.25	74.56	300.1	102	0.34	0.15	97.8	0.53
RH	14	4	0.8	0.34	88.4	28.16	0.71	7.57	0.8	3.72	15	24.03	12	12	0.24	9.5	5.8	15.3	4.7	20	54	0.93	1127.62	156.14	4.13	1287.89	319.35	97.65	5.49	422.49	7.2	5.09	0.6	12.89	25	11.88	0.31	84.18	274.02	99.94	0.36	0.18	89.89	0.57
RH	14	5	0.65	0.31	84.9	27.07	0.65	7.25	0.8	3.74	54	21.3	16	16	0.27	13.9	6.9	20.8	4.5	25.3	45.5	0.89	1272.18	177.5	8.85	1458.53	354.91	91.65	6.41	452.97	7.88	5.8	0.84	14.52	19.74	10.84	0.22	70.12	324.12	100.43	0.31	0.17	100.66	0.65
WW	21	1	0.79	0.19	88.1	31.73	0.75	4.55	0.8	6.97	97.5	20.68	12	12	0.26	10.4	22.7	33.1	5.1	38.2	47.5	0.96	795.69	131.12	6.67	933.48	215.82	63.17	6.19	285.18	4.33	2.66	0.49	7.48	24.71	6.74	0.15	28.24	183.03	124.72	0.68	0.11	55.92	0.41
WW	21	2	0.64	0.31	83.2	34.18	0.65	4.51	0.75	7.57	97	19.96	10	10	0.23	8.9	24.1	33	6.6	39.6	53.5	0.66	714.16	133.85	5.27	853.28	220.14	59.94	5.93	286	3.57	2.79	0.41	6.78	26.16	5.85	0.2	25.9	129.28	125.82	0.97	0.12	43.33	0.38
WW	21	3	0.68	0.32	89.3	25.18	0.68	4.52	0.82	5.57	84	19.28	12	12	0.19	6.9	21.5	28.4	5.4	33.8	44.5	0.63	420.73	87.73	4.76	513.21	155.57	40.22	4.3	200.08	1.88	1.52	0.31	3.71	27.68	5.66	0.19	18.1	95.04	138.18	1.45	0.1	37.05	0.23
WW	21	4	0.58	0.19	84.8	29.94	0.67	4.69	0.79	6.38	100	19.5	12	12	0.22	9	22.7	31.6	5.6	37.2	47	0.66	711.56	94.58	3.06	809.2	142.68	42.12	3.65	188.45	2.29	1.55	0.38	4.21	25.03	6.02	0.18	25.61	144.5	192.01	1.33	0.08	33.65	0.36
WW	21	5	0.83	0.2	85.2	28.67	0.59	4.48	0.77	6.4	95	20.67	15	15	0.19	9.6	14.6	24.1	9.6	33.7	54	0.68	562.23	125.27	6.73	694.23	117.17	60.29	6.26	183.72	1.98	2.43	0.47	4.88	19.88	5.63	0.4	28.81	72.32	142.24	1.97	0.1	19.14	0.31
WD	21	1	1.01	0.41	76	28.76	0.53	4.18	0.75	6.88	76	19.35	12	12	0.16	8.9	13.3	22.2	8.6	30.8	48	0.61	1557.93	140.15	2.68	1700.76	296.63	57.11	2.1	355.83	4.49	1.9	0.13	6.53	18.04	5.21	0.39	76.61	197.76	260.62	1.32	0.22	41.38	0.76
WD	21	2	1.16	0.31	67.6	31.2	0.4	3.28	0.65	9.52	87	16.97	14	14	0.14	8.8	13.8	22.6	7.3	29.9	58.5	0.65	1137.3	156.73	4.17	1298.21	230.51	69.27	7.06	306.84	3.72	2.51	0.27	6.5	16.11	4.74	0.32	57.44	177.84	199.8	1.12	0.22	42.03	0.58
WD	21	3	0.92	0.37	77	29.84	0.64	4.38	0.78	6.82	89	13.6	5	5	0.12	5.2	15	20.2	5.7	25.9	55	0.68	1072.64	118.51	3.57	1194.72	190.6	53.74	3.16	247.5	3.23	2.03	0.23	5.49	22.56	4.54	0.28	59.14	211.08	217.59	1.03	0.21	43.73	0.53
WD	21	4	1.03	0.38	76.2	32.64	0.64	4.59	0.76	7.11	97	16.5	13	13	0.13	7.3	16.5	23.8	4.6	28.4	52	0.68	1108.2	135.29	3.58	1247.07	219.08	35.02	3.05	257.16	3.57	2.34	0.21	6.12	18.15	4.66	0.19	52.4	271.1	203.91	0.75	0.19	55.9	0.55
WD	21	5	0.99	0.41	81.2	28.06	0.32	3.02	0.61	9.31	83	11.69	12	12	0.21	12.8	21.1	33.9	5.3	39.2	60	0.68	1273.66	185.87	2.81	1462.34	271.28	92.01	3.15	366.44	4.6	3.86	0.28	8.74	16.54	5.4	0.16	43.14	275.91	167.25	0.61	0.17	69.14	0.65
RH	21	1	0.91	0.33	87.2	28.43	0.67	6.84	0.79	4.15	79	13.31	10	10	0.19	6.9	15.6	22.5	5.2	27.7	51	0.71	610.3	55.36	6.5	672.16	134.55	24.41	4.42	163.38	2.36	1.34	0.24	3.94	27.94	6.96	0.23	29.87	129.26	170.55	1.32	0.08	31.42	0.3
RH	21	2	0.8	0.31	87.8	29.57	0.59	6.38	0.76	4.63	57	15.07	12	12	0.19	6.6	15.3	21.9	6	27.9	49	0.7	700.31	102.01	5.27	807.59	148.17	47.49	3.44	199.09	2.5	1.84	0.25	4.59	29.5	6.98	0.27	36.88	134.6	175.96	1.31	0.1	33.18	0.36
RH	21	3	0.92	0.25	85.8	29.05	0.58	6.18	0.76	4.7	82	22.15	14	14	0.18	8.5	16.2	24.7	5	29.7	39	0.67	884.44	103.31	3.4	991.15	185.24	46.22	3	234.46	3.09	1.69	0.21	4.99	21.46	6.14	0.2	40.13	198.23	198.62	1	0.13	46.89	0.44
RH	21	4	0.78	0.24	87.3	28.31	0.62	6.29	0.78	4.5	84	14.47	11	11	0.12	4.9	21	25.9	5.9	31.8	41	0.63	528.58	72.75	3.91	605.24	103.79	32.58	2.91	139.28	1.62	1.19	0.19	3.01	23.61	3.64	0.23	23.37	102.58	201.23	1.96	0.12	23.61	0.27
RH	21	5	0.6	0.25	87.8	28.27	0.57	5.75	0.77	4.91	79	13.99	9	9	0.2	4.9	16.2	21.1	5.4	26.5	35	0.68	415.27	67.65	4	486.93	131.74	30.42	3.4	165.57	1.45	1.12	0.23	2.8	40.64	7.52	0.26	23.08	90.17	173.99	1.93	0.08	30.66	0.22
